# Supplementary material
Source: PubMed Central journal article supplement (PMC1142581)
Supplement: 7600648s5.pdf [file 7600648s5.pdf]

**Supplementary Table I Identification of the 36kDa PKB substrate as methyltransferase-like protein-1 (METTL1).** The 36 kDa protein was purified, digested with trypsin and analysed on a Perspective Biosystems (Framingham, MA) Elite SR matrix-assisted laser desorption time of flight (MALDI-TOF) mass spectrometer. The tryptic mass ions obtained were scanned against the Swiss-Prot and GenPep databases using the MS-FIT program of Protein Prospector. 41 peptides were detected, 15 of which could be matched with the sequence of human methyltransferase-like protein-1, giving 36% coverage of the protein.

| Masses submitted | Masses matched | Start | End | Peptide Sequence                |
|------------------|----------------|-------|-----|---------------------------------|
| 864.4907         | 864.4732       | 251   | 257 | NFPAIFR                         |
| 981.4954         | 981.4641       | 112   | 119 | VSDYVQDRI                       |
| 1065.5664        | 1065.5522      | 144   | 151 | HLPNFFYKG                       |
| 1178.6303        | 1178.6170      | 7     | 18  | NVAGAEAPPQKR                    |
| 1334.7069        | 1334.7181      | 7     | 19  | NVAGAEAPPQKRY                   |
| 1349.6474        | 1349.6384      | 25    | 36  | AHSNPMADHTLRY                   |
| 1365.6310        | 1365.6334      | 25    | 36  | AHSNPMADHTLRY                   |
| 1425.7079        | 1425.7029      | 157   | 167 | MFFLFPDPHFKR                    |
| 1441.7236        | 1441.6979      | 157   | 167 | MFFLFPDPHFKR                    |
| 1445.7471        | 1445.7323      | 125   | 138 | AAPAGGFQNIACLR                  |
| 1721.9882        | 1721.9842      | 175   | 189 | IISPTLLAEYAYVLRV                |
| 1890.9521        | 1890.9925      | 259   | 276 | IQDPVLQAVTSQTSPLGH              |
| 2047.0644        | 2047.0936      | 258   | 276 | RIQDPVLQAVTSQTSPLGH             |
| 2408.2297        | 2408.1833      | 220   | 242 | VPLEDLSEDPVVGHLGTSTEEGKK        |
| 3737.5671        | 3737.7110      | 37    | 37  | YPVKPEEMDWSELYPEFFAPLTQNSHDDPKD |
